# Supplementary material for: Voltammetric responses at modified electrodes and aggregation effects of two anticancer molecules: irinotecan and sunitinib
Source: Royal Society of Chemistry journal article supplement (doi:10.1039/d0nj03896b), 2020-01-01
Supplement: d0nj03896b1.pdf [file d0nj03896b1.pdf]

## Electronic Supplementary Information (ESI)

### Voltammetric responses at Modified Electrodes and Aggregation Effects of Two Anticancer molecules: Irinotecan and Sunitinib

Barbara Vercelli<sup>a\*</sup>, Sara Crotti<sup>b</sup>, Marco Agostini<sup>b,c</sup>

<sup>a</sup>Istituto di Chimica della Materia Condensata e di Tecnologie per l'Energia, CNR-ICMATE, Via R. Cozzi 53, 20125 Milano (Italy)

<sup>b</sup>Istituto di Ricerca Pediatrica – Città della Speranza, Corso Stati Uniti 4, 35127 Padova, (Italy).

<sup>c</sup>Sezione di Clinica Chirurgica, Dipartimento di Scienze Chirurgiche, Oncologiche e Gastroenterologiche, Università degli Studi di Padova, Via Giustiniani, 2 – 35124 Padova (Italy)

\*Barbara Vercelli

Tel.: +39 0266173314. e-mail: [barbara.vercelli@icmate.cnr.it](mailto:barbara.vercelli@icmate.cnr.it); [barbara.vercelli@cnr.it](mailto:barbara.vercelli@cnr.it)

#### Contents

**Figure S1.** Normalized Single Sweep Cyclic Voltammograms of SUN at ITO, ITO/NT and GC electrodes.

**Figure S2.** Single Sweep cyclic voltammograms of ITC at GC and CG/NafionNT electrodes.

**Figure S3.** Single Sweep cyclic voltammograms of SUN at CG/NafionNT in pH 5, 7, 9, 10 buffers.

**Figure S4.** Calibration curves of ITC and SUN in pH 9 and 7 buffers, respectively.

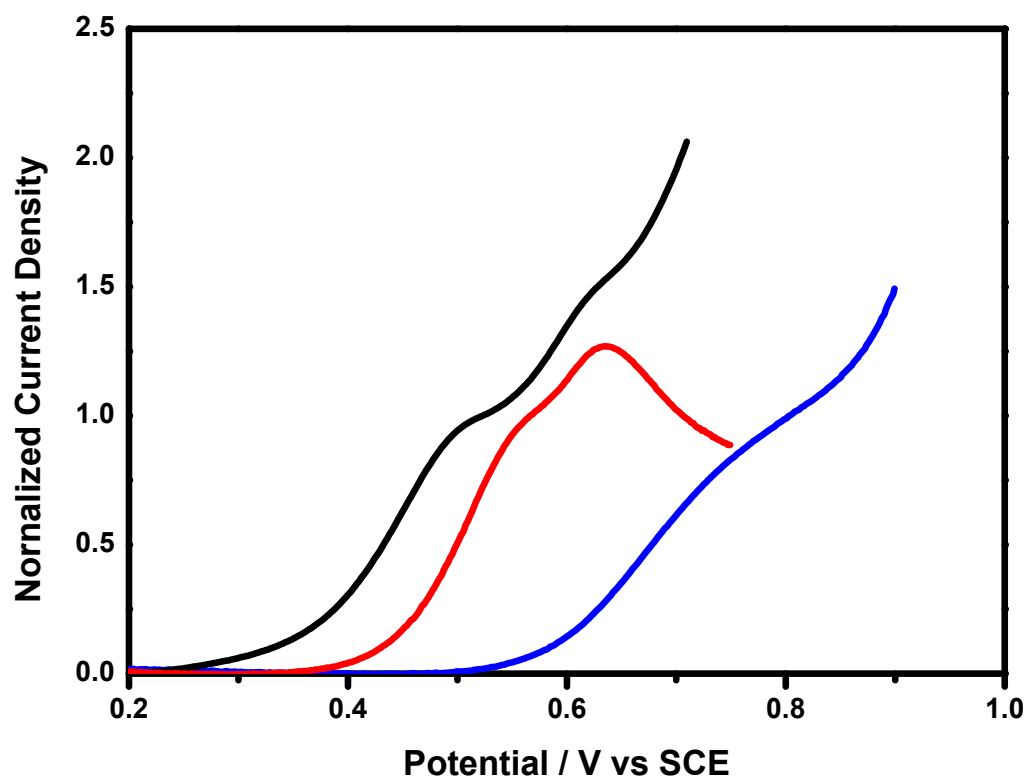

**Figure S1.** Normalized Single Sweep Cyclic Voltammograms of SUN  $4 \times 10^{-5}$  M in 1:3 v/v DMSO/water pH 9 buffer + 0.1 NaCl at: ITO (blue line), ITO/NT (black line) and GC (red line) electrodes.  $v = 0.02 \text{ V s}^{-1}$ .

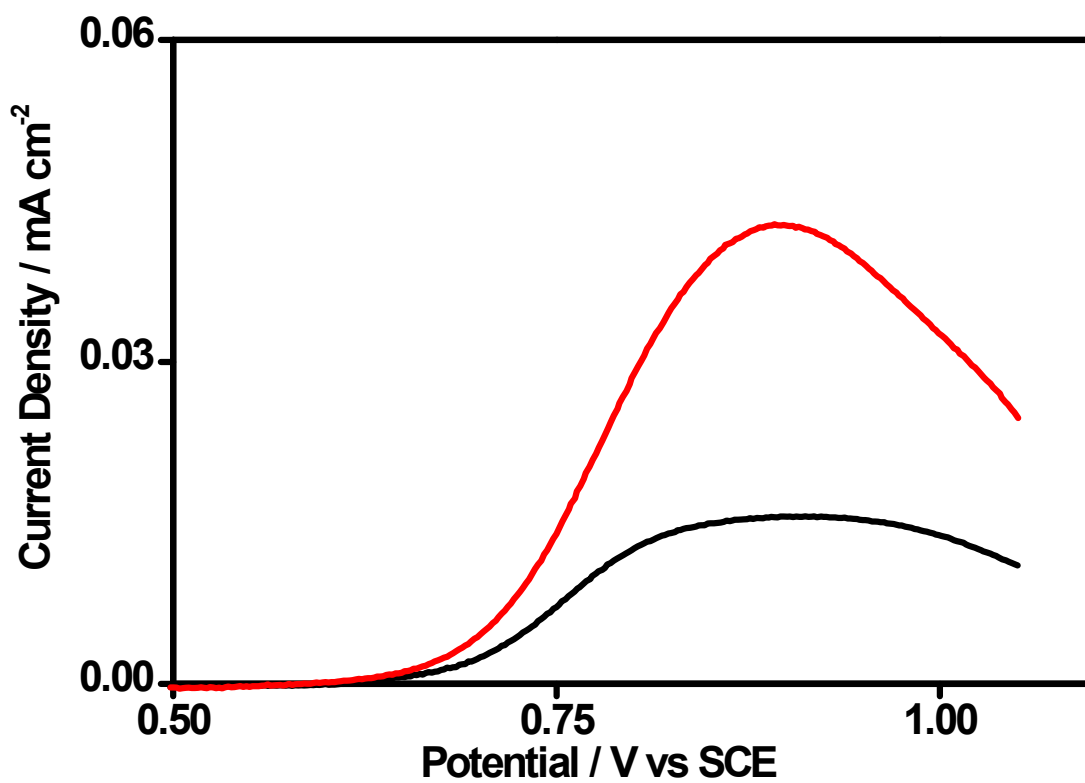

**Figure S2.** Single Sweep cyclic voltammograms of ITC  $10^{-4}$  M in pH 7 buffer + 0.1 NaCl at CG (black line) and CG/NafionNT (red line) electrodes.  $v = 0.02 \text{ Vs}^{-1}$ .

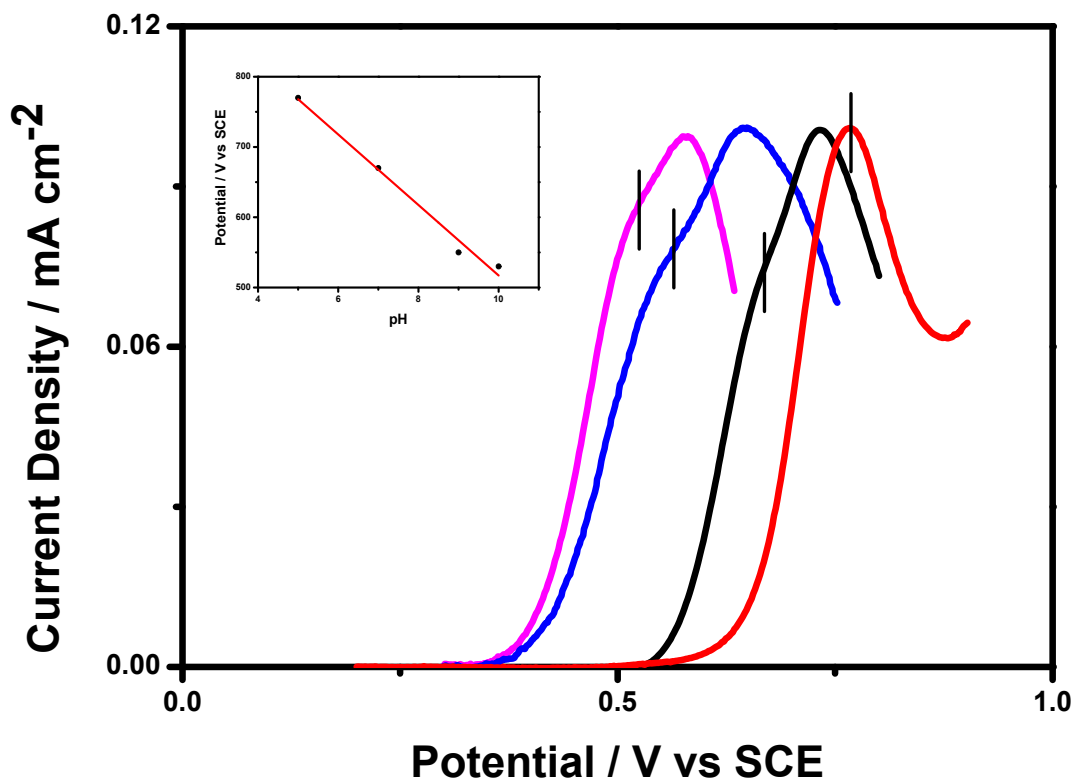

**Figure S3.** Single Sweep cyclic voltammograms at CG/NafionNT electrodes of SUN  $3 \times 10^{-5}$  M in pH 5 (red line), 7 (black line), 9 (blue line) and 10 (pink line) buffers.  $v = 0.02 \text{ V s}^{-1}$ . Insert SUN oxidation peak potential vs pH.

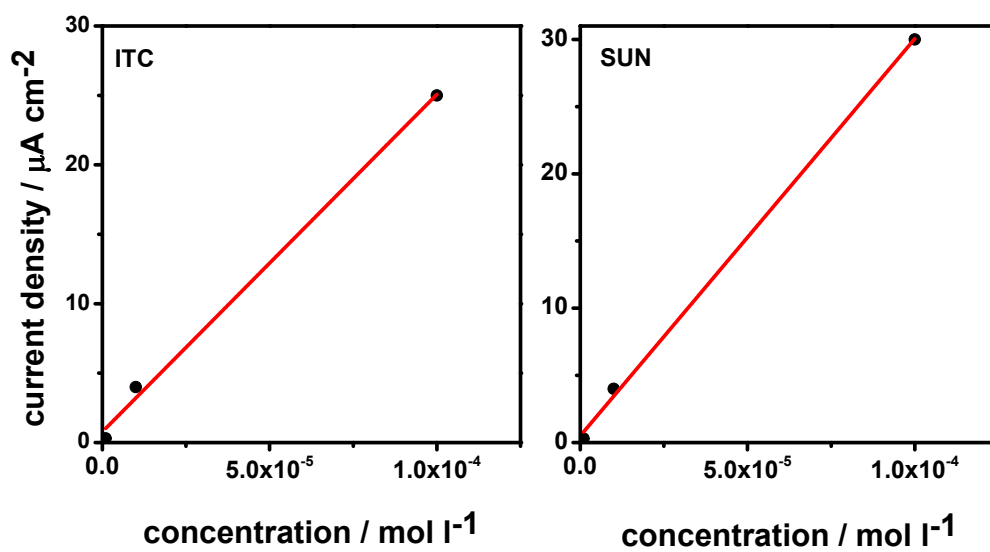

**Figure S4.** Calibration curves of ITC and SUN in pH 9 and pH 7 buffers, respectively.
